# Supplementary material for: Exploring the different ligand escape pathways in acylaminoacyl peptidase by random acceleration and steered molecular dynamics simulations
Source: Royal Society of Chemistry journal article supplement (doi:10.1039/c5ra24952j), 2016-01-01

**Fig. s1** (a) the 3D structure of Ac-Leu-pNA; (b) The 3D structure pNPC8.

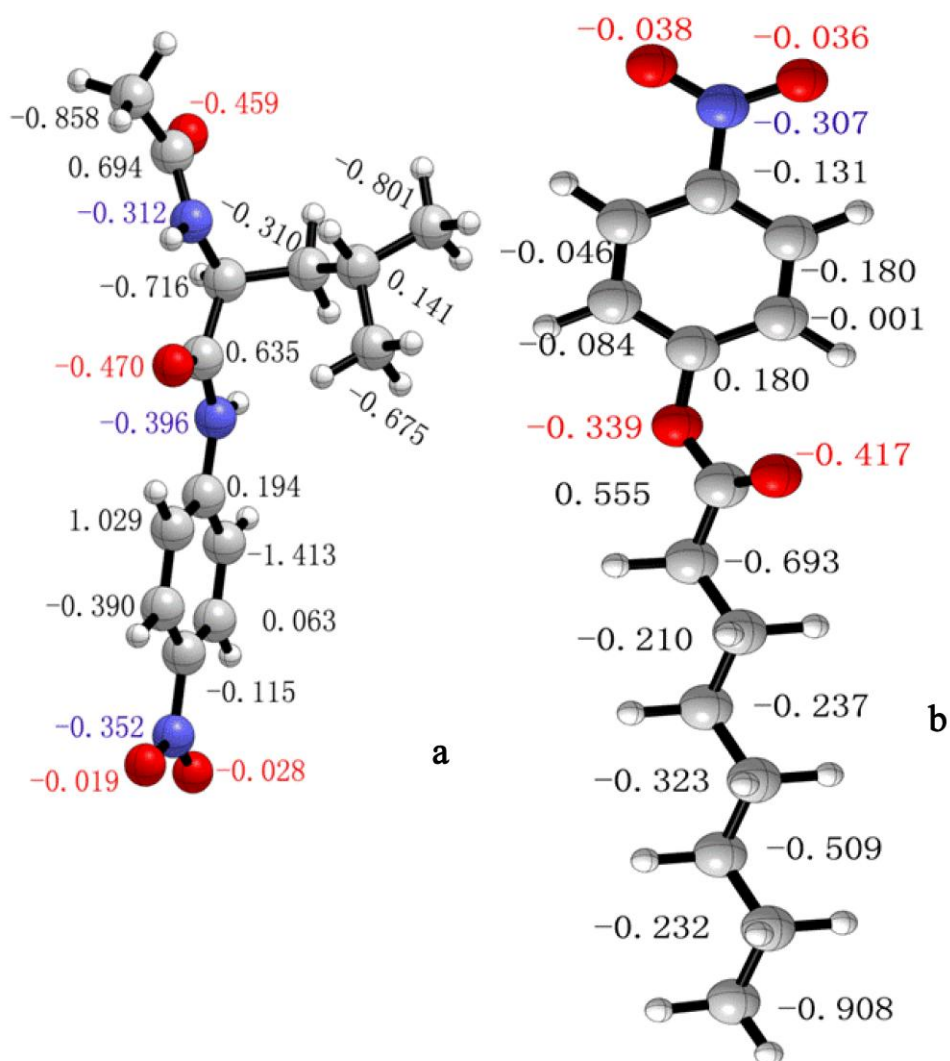

**Fig. s2** (a) Three similar docked poses with different scores for Ac-Leu-pNA (blue (-7.8 kcal/mol), magenta (-7.2 kcal/mol), cyan (-6.8 kcal/mol)). Snapshots of Ac-Leu-pNA/APH at (b) 0.6, (c) 1.2 and (d) 2ns.

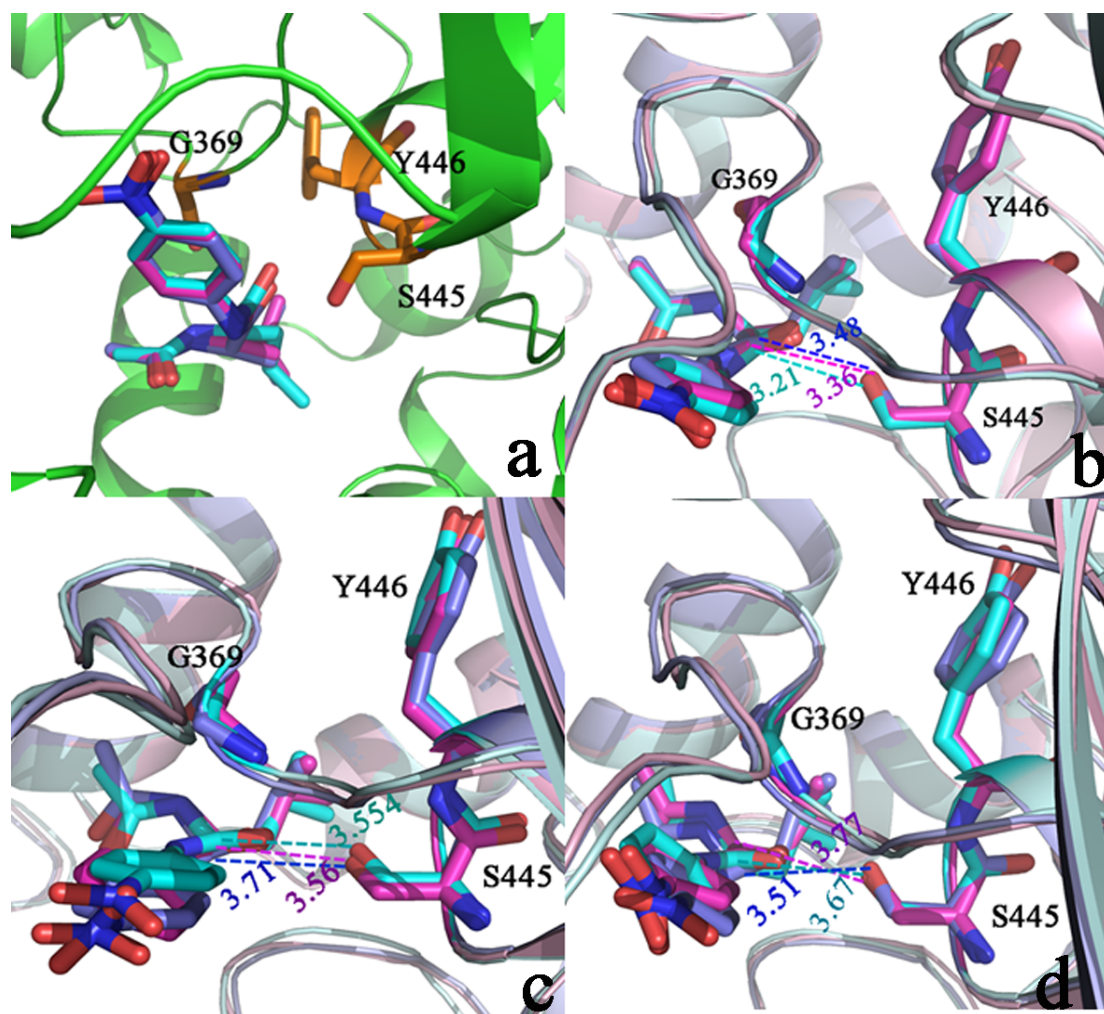

**Fig. s3** (a) Three similar docked poses with different scores for *p*NPC8 (blue (-7.9 kcal/mol), magenta (-7.4 kcal/mol), cyan (-7.0 kcal/mol)).

Snapshots of *p*NPC8/APH at (b) 0.6, (c) 1.2 and (d) 2ns.

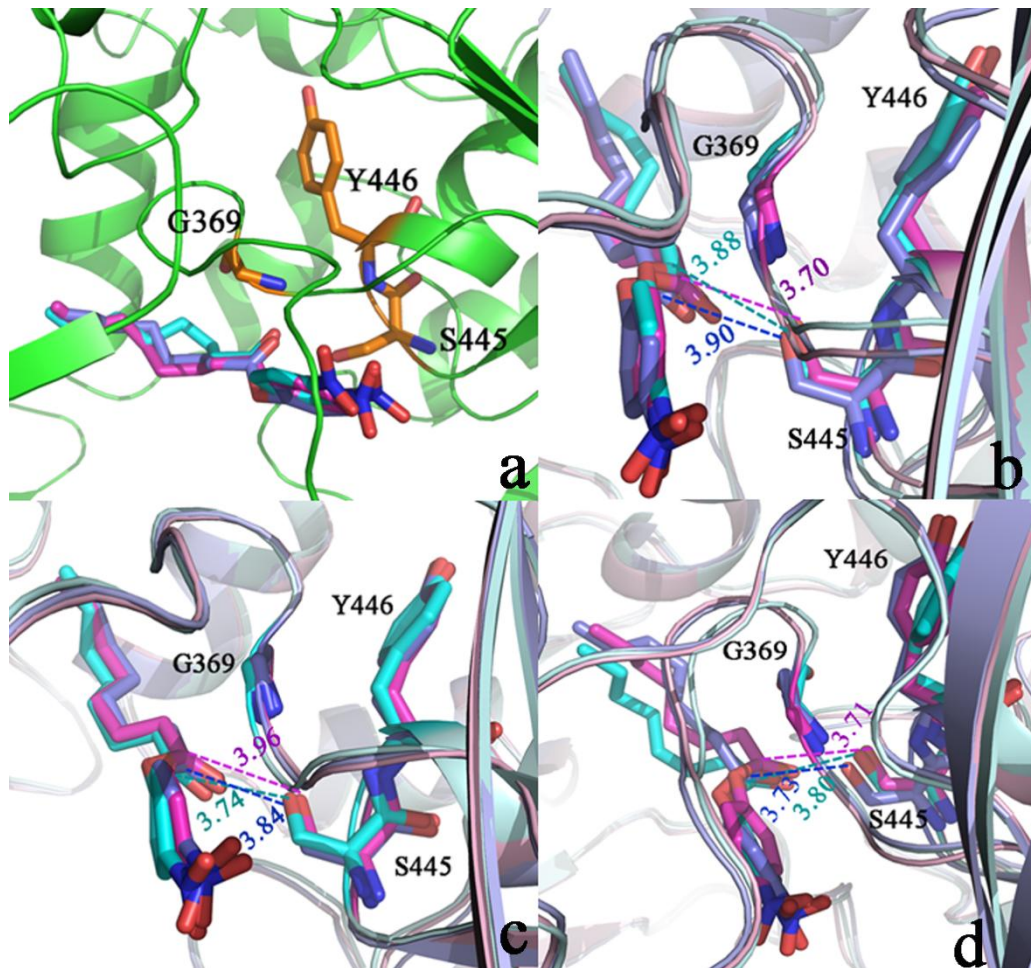

**Fig. s4** The binding mode of *p*NPC8 at force peak via P2A.

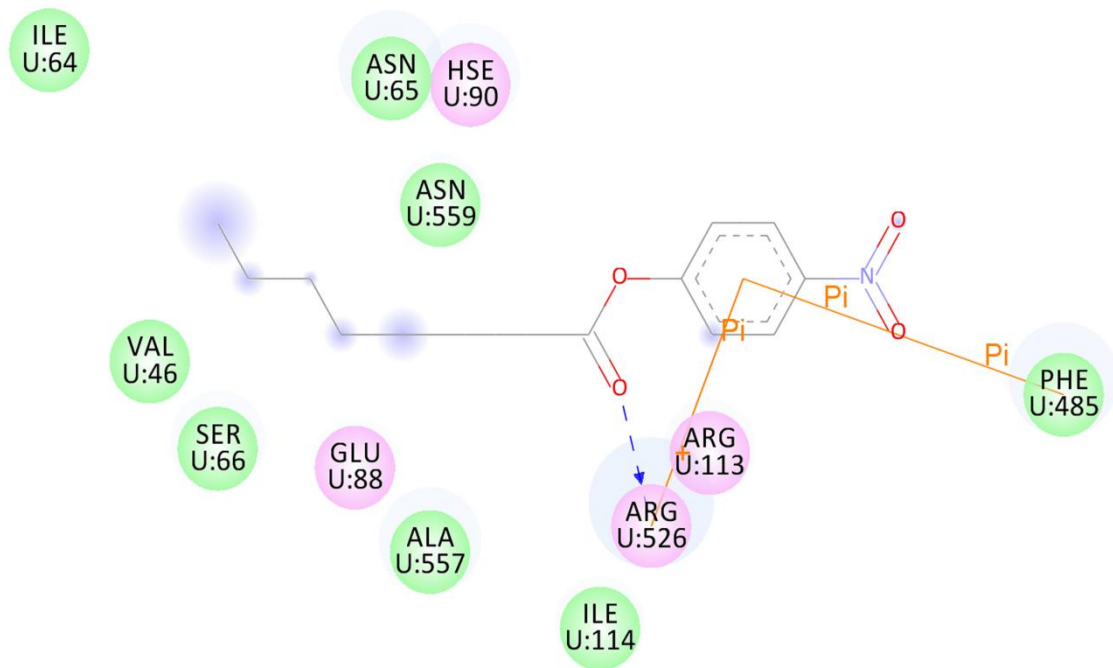

**Fig. s5** The binding mode of Ac-Leu-pNA at force peak via P1.

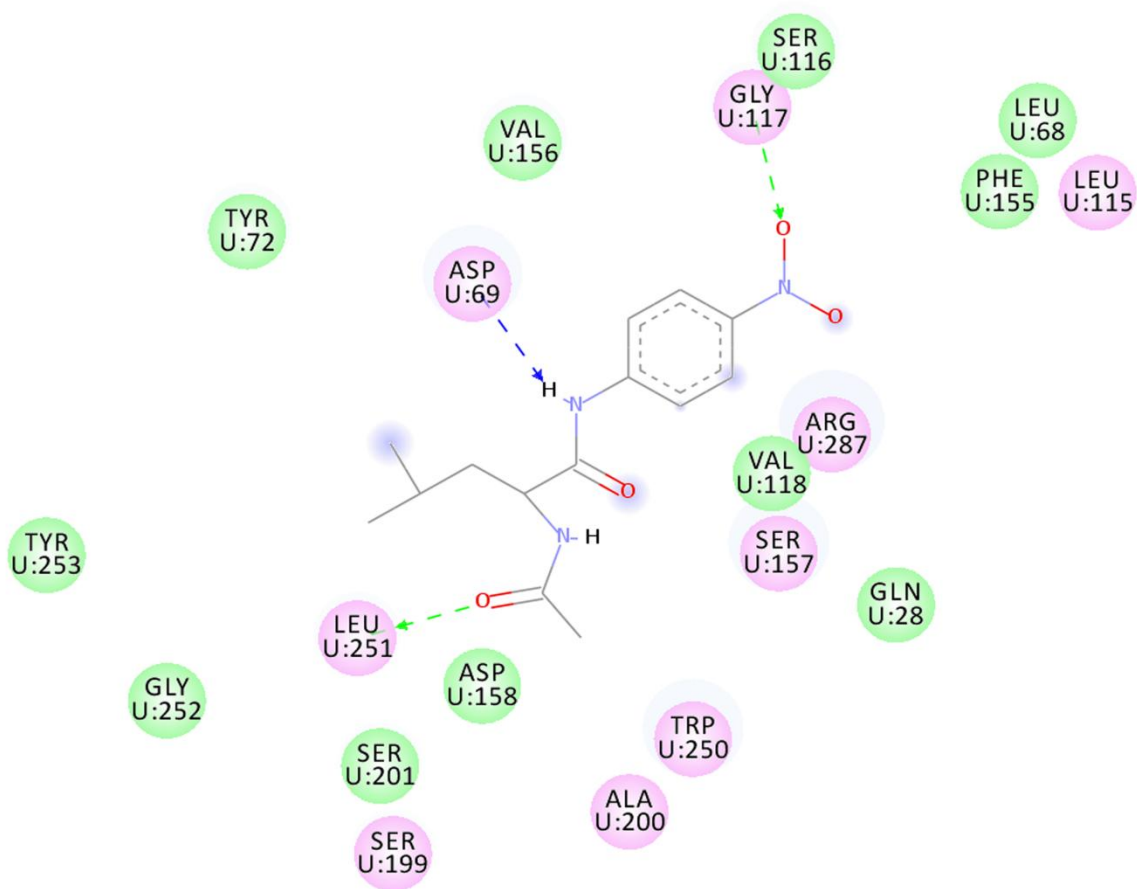

**Fig. s6** Snapshots of *p*NPC8 unbinding from APH along P3 at (a) 1.5, (b) 2.2, (c) 4.5, and (d) 6.6 ns.

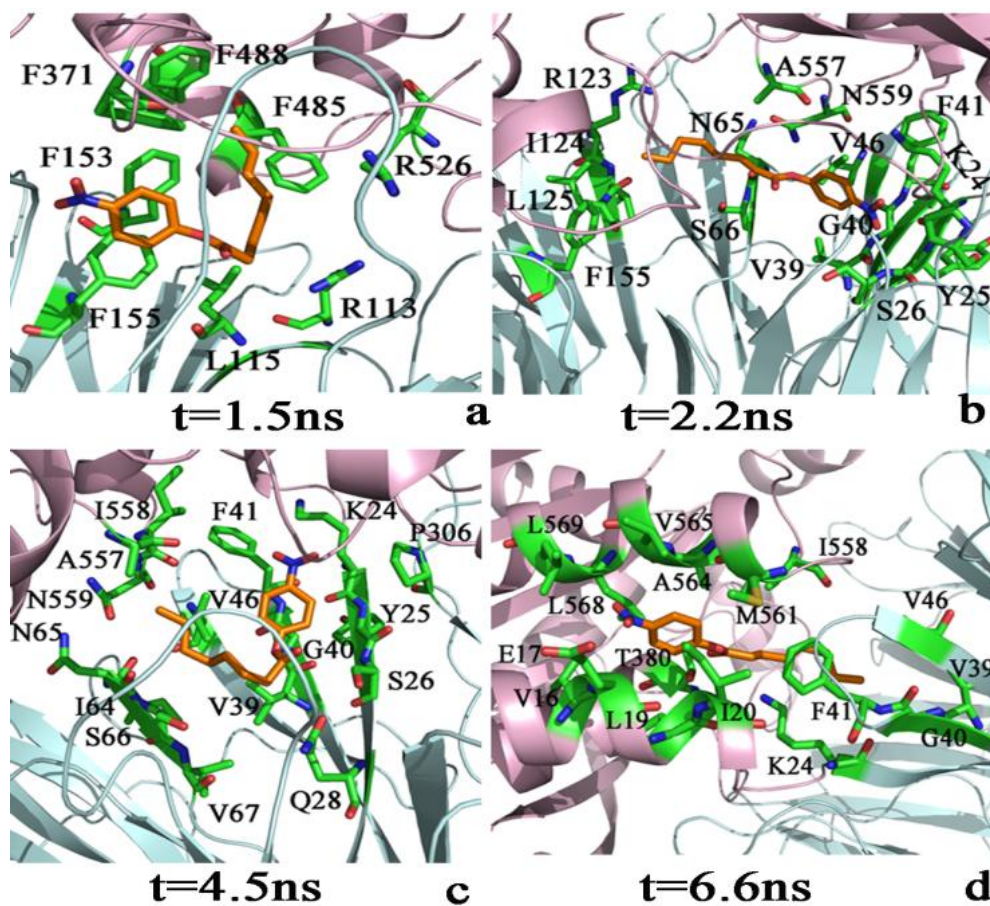

**Fig. s7** The binding mode of *p*NPC8 at force peak via P3.

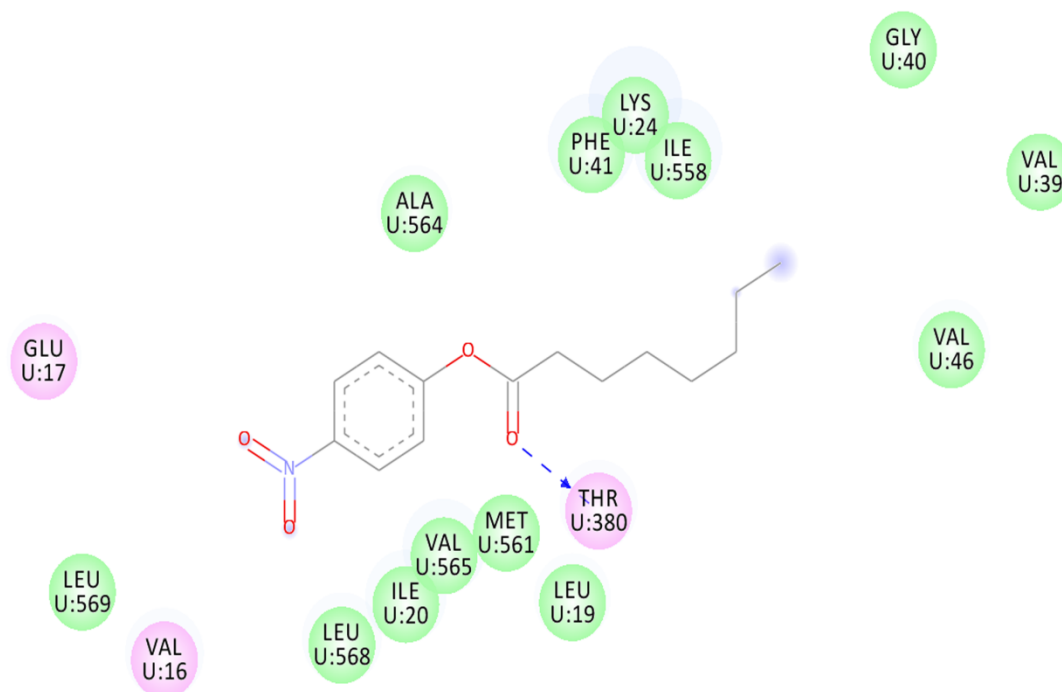

**Fig. s8** Snapshots of Ac-Leu-pNA unbinding from APH along P3 at (a) 1.9, (b) 2.6, (c) 2.7, and (d) 7.1 ns.

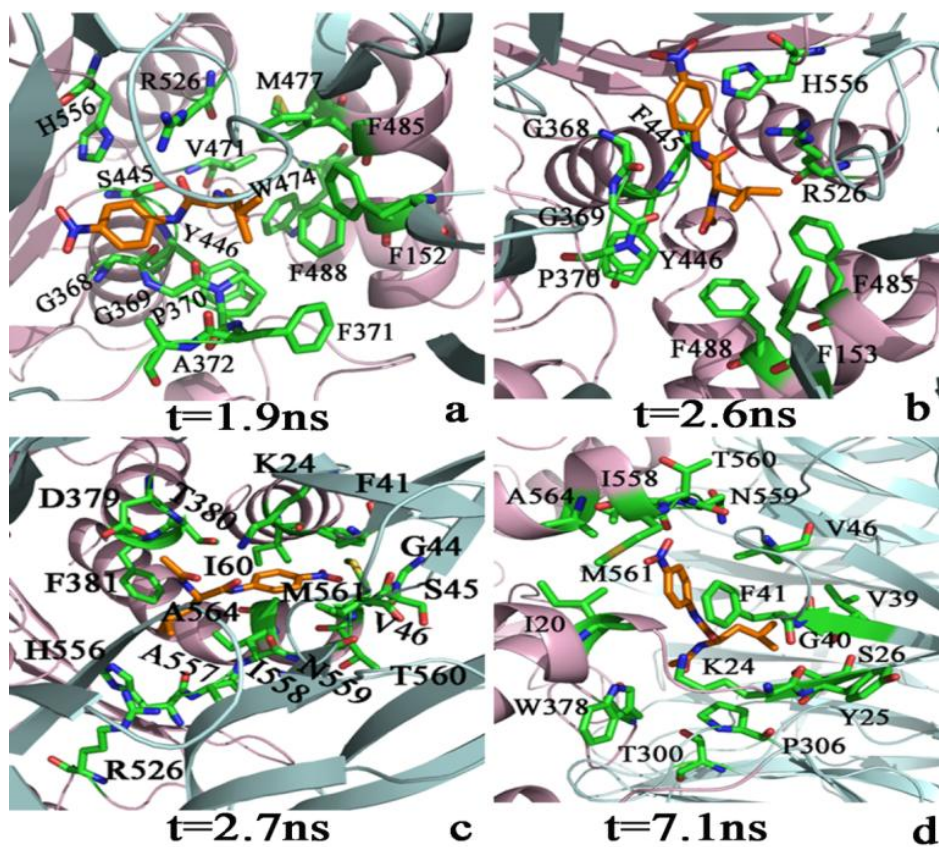



**Fig. s9** The binding mode of Ac-Leu-pNA at force peak via P3.

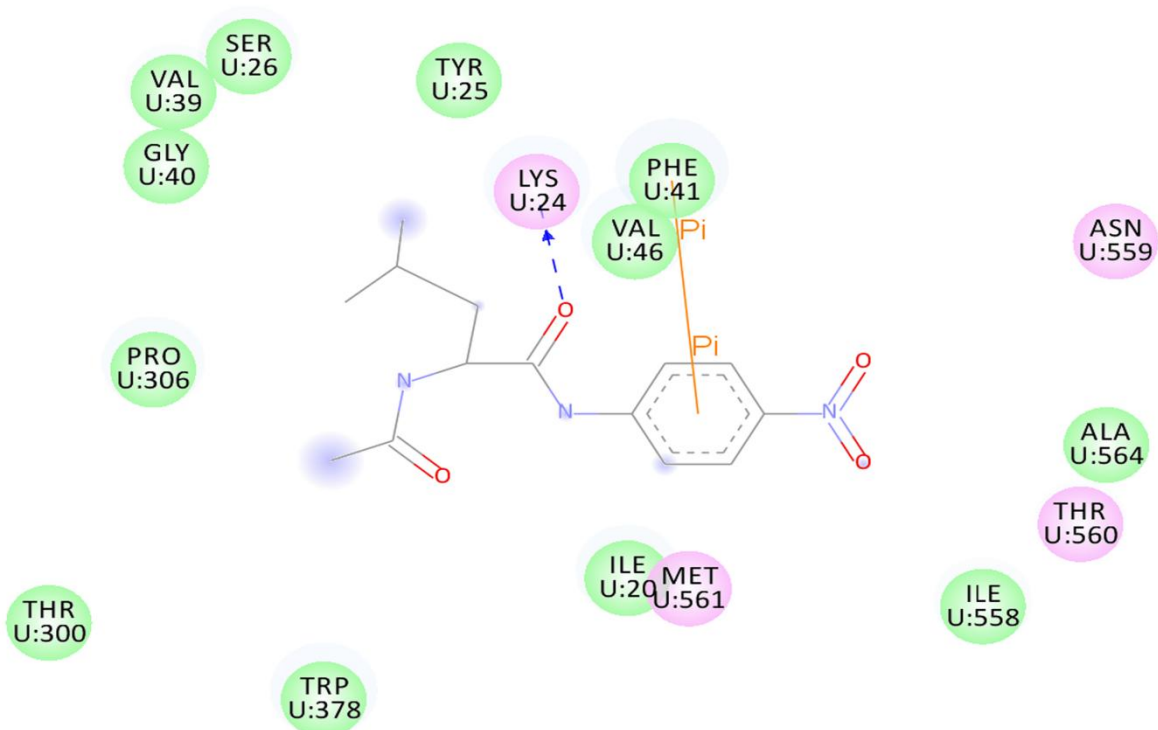

**Fig. s10** The distance between aromatic ring of Phe485 and guanidine group of Arg526 (P2A).

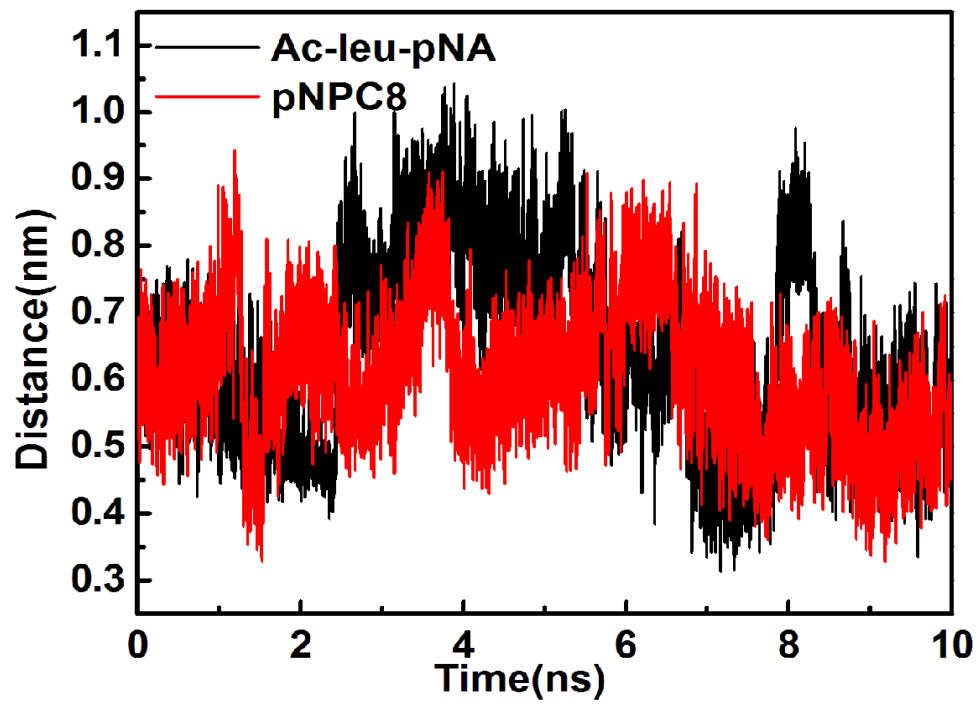

**Fig. s11** PMF profile along the unbinding pathway of *p*NPC8 via (a) P2A, (b) P1, and (c) P3; and of Ac-Leu-*p*NA via (d) P1, (e) P2A, and (f) P3. Given that the process is reversible, the free energy profile also applies to the binding process.

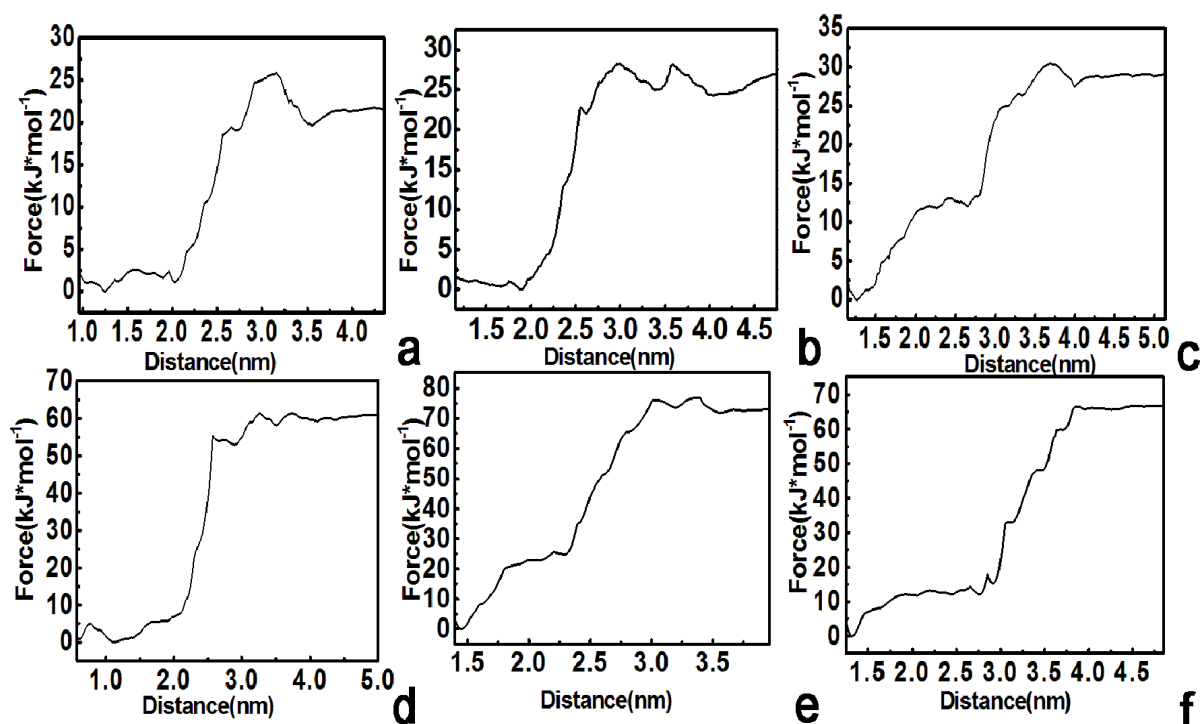

Supplement: c5ra24952j1.pdf [file c5ra24952j1.pdf]
